# Supplementary material
Source: PubMed Central journal article supplement (PMC6154761)
Supplement: Supp_Data.pdf [file Supp_Data.pdf]

## Supplementary Data

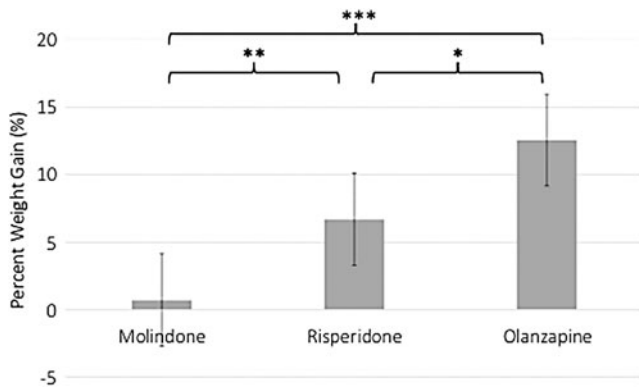

**SUPPLEMENTARY FIG. 1.** Percent weight gain. Error bars are standard error. \* $p < 0.05$ , \*\* $p < 0.01$ , \*\*\* $p < 0.001$ .

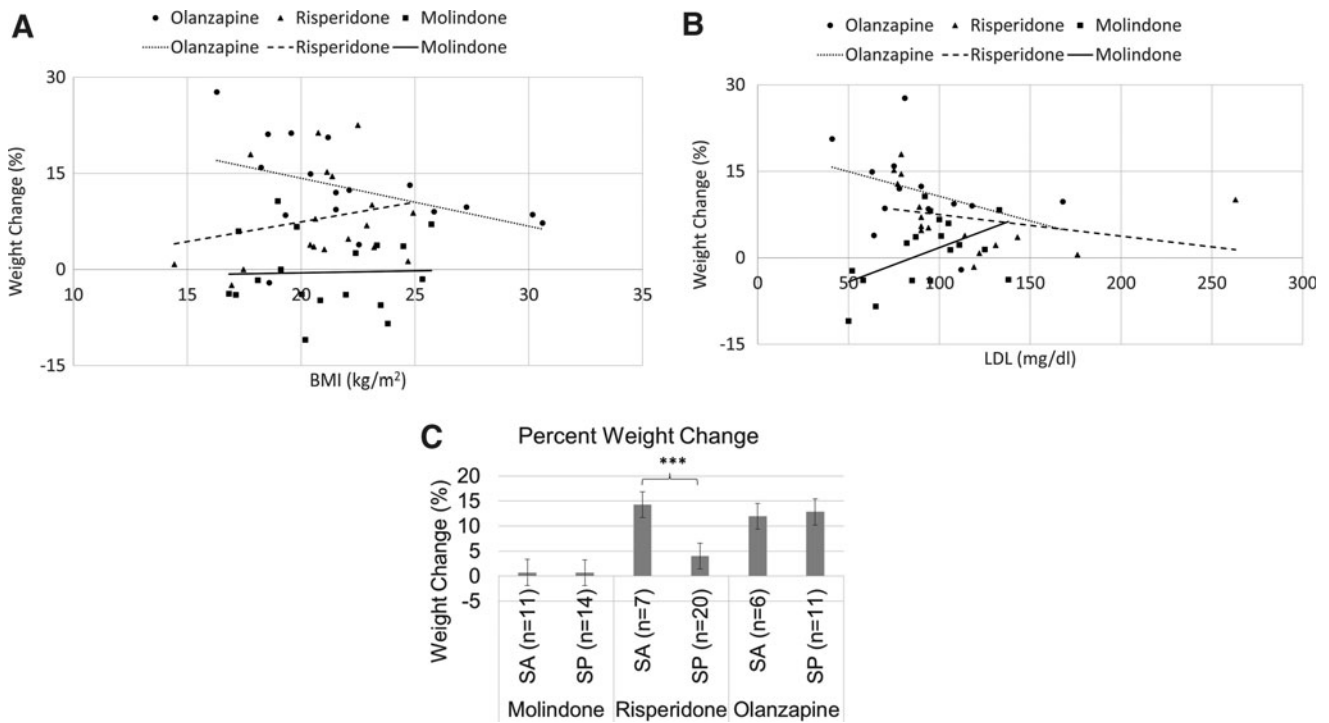

**SUPPLEMENTARY FIG. 2.** (A) Relationship between percent weight change and BMI. (B) Relationship between percent weight change and fasting LDL cholesterol. (C) Percent weight change by diagnosis. Error bars are standard error. BMI, body mass index; LDL, low-density lipoprotein; SA, schizoaffective; SP, schizophrenia. \*\*\* $p < 0.001$ .

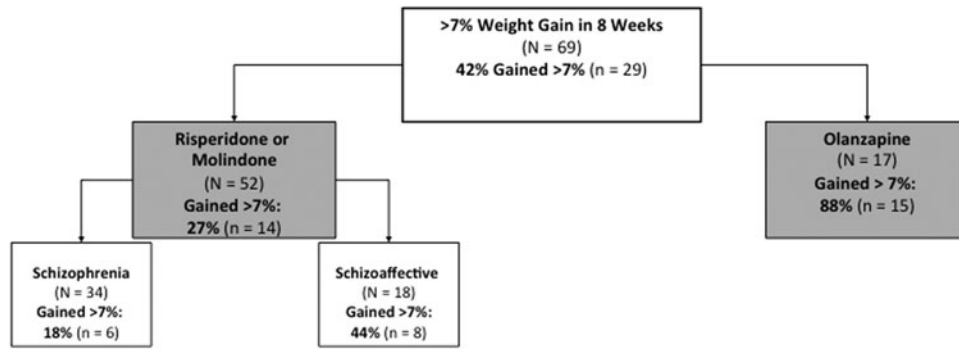

**SUPPLEMENTARY FIG. 3.** Prognostic subgroups for percent weight gain. Gray:  $p < 0.001$ , white:  $p < 0.05$ .
